# Supplementary material for: Prophylactic Medication during Radioembolization in Metastatic Liver Disease: Is It Really Necessary? A Retrospective Cohort Study and Systematic Review of the Literature
Source: MDPI journal article supplement (doi:10.3390/diagnostics13243652), 2023-12-12
Supplement: s1 [file s1]

## Supplementary Materials

**Supplementary Table S1:** Hepatotoxicity score\*

|                                                                                                                                                                                                                                                                                                                     |                                                                                                                                                             |
|---------------------------------------------------------------------------------------------------------------------------------------------------------------------------------------------------------------------------------------------------------------------------------------------------------------------|-------------------------------------------------------------------------------------------------------------------------------------------------------------|
| <b>Grade 0</b>                                                                                                                                                                                                                                                                                                      | No liver toxicity (i.e. no CTCAE toxicity grade changes over baseline).                                                                                     |
| <b>Grade 1</b>                                                                                                                                                                                                                                                                                                      | Minor liver toxicity, limited to increased AST, ALT, ALP and/or GGT levels (all not exceeding newly developed grade 1 CTCAE toxicity).                      |
| <b>Grade 2</b>                                                                                                                                                                                                                                                                                                      | Moderate liver toxicity, with a self-limiting course. No medical intervention necessary.                                                                    |
| <b>Grade 3</b>                                                                                                                                                                                                                                                                                                      | REILD, manageable with non-invasive treatments such as diuretics, ursodeoxycholic acid and steroids.                                                        |
| <b>Grade 4</b>                                                                                                                                                                                                                                                                                                      | REILD necessitating invasive medical treatment such as paracentesis, transfusions, haemodialysis or a transjugular intrahepatic portosystemic shunt (TIPS). |
| <b>Grade 5</b>                                                                                                                                                                                                                                                                                                      | Fatal REILD.                                                                                                                                                |
| <p>*Grading according to Braat et al. [17]</p> <p><i>Abbreviations: ALP = alkaline phosphatase, ALT = alanine aminotransferase, AST = aspartate aminotransferase, GGT = gamma-glutamyl transferase, CTCAE = Common Terminology Criteria for Adverse Events, REILD = radioembolization-induced liver disease</i></p> |                                                                                                                                                             |

**Supplementary Table S2:** Literature search strategy

|                                                                                                                                                                                                                                                                                                                                                                                                                                                                                                                                                                                                                                                                                                                                                                                                            |
|------------------------------------------------------------------------------------------------------------------------------------------------------------------------------------------------------------------------------------------------------------------------------------------------------------------------------------------------------------------------------------------------------------------------------------------------------------------------------------------------------------------------------------------------------------------------------------------------------------------------------------------------------------------------------------------------------------------------------------------------------------------------------------------------------------|
| <b>Main search string</b>                                                                                                                                                                                                                                                                                                                                                                                                                                                                                                                                                                                                                                                                                                                                                                                  |
| <p>("radioembolic"[All Fields] OR "radioembolisation"[All Fields] OR "radioembolization"[All Fields] OR radio-emboli* [All Fields] OR "SIRT"[All fields] OR "selective internal radiation therapy"[All Fields] OR "TARE" [All Fields] OR "transarterial radioembolization"[All Fields])</p> <p><b>AND</b></p> <p>((("liver"[MeSH Terms] OR "liver"[All Fields] OR neoplasm metastasis[MeSH Terms] OR liver neoplasm[MeSH Terms]))</p> <p><b>AND</b></p> <p>("octreotid"[All Fields] OR "octreotide"[MeSH Terms] OR "octreotide"[All Fields] OR "somatostatin"[All Fields] OR SSA[All Fields] OR "Anti-Bacterial Agents"[Mesh] OR "Antibiotic Prophylaxis"[Mesh] OR antibioti* [All Fields] OR anti-emetic [All Fields] OR prophylaxis [All Fields] OR analgesics [All Fields] OR steroids[All Fields])</p> |

### **Supplementary data on the literature review of PPI/H2 antagonists**

Concerning other PPM (proton pump inhibitors (PPI), H2-antagonists and antibiotics), efficacy is even more questionable and proper evidence is lacking. Lim et al. advised H2-antagonists, because of gastroscopy proven gastrointestinal ulceration in 8% (4 patients, of which 3 biopsy proven) [20]. The applicability of H2-antagonists or PPI in contemporary practice is debatable since most centers perform improved pre-treatment work-up with perprocedural conebeam-CT and  $^{99m}\text{Tc}$ -MAA SPECT/CT to prevent extrahepatic deposition of activity. More recent studies looking at radiation absorbed doses to the stomach after left lobe treatments showed negligible absorbed doses (i.e.  $13 \pm 9$  Gy) and low rates of GI-ulceration ( $<3\%$ ) [24–27]. Although questionable, in absence of a comparator group (i.e. without any form of PPM) no definitive judgment can be made on the efficacy of H2-antagonists or PPI.
